# Supplementary material for: Relocation of earthquake clusters show seismogenic transverse structures in the Inner Northern Apennines (Italy)
Source: Frontiers journal article supplement (doi:10.3389/feart.2024.1474036), 2024-10-14
Supplement: Table_1.xls [file Table_1.xls]

## Sheet: Onshore Cluster
Onshore Cluster: Position of the earthquakes after re-location
Year	months	day	hour	min	sec	latitude	longitude	depth
2015	7	21	22	4	6.92	43.8244	10.3523	7.504
2015	7	25	0	55	14.02	43.8205	10.3511	6.138
2015	7	25	7	29	20.48	43.8255	10.347	5.134
2015	7	28	4	23	14.55	43.831	10.3536	5.449
2015	7	28	6	45	52.65	43.8173	10.3411	1.687
2015	8	8	3	21	38.88	43.8237	10.3403	4.206
2015	8	8	8	18	57.48	43.8242	10.3452	5.855
2015	8	8	8	23	41.43	43.8264	10.3523	6.856
2015	8	8	13	49	24.73	43.8203	10.3452	6.144
2015	8	8	17	30	49.32	43.8256	10.3515	4.647
2015	8	8	17	31	44.24	43.8214	10.3529	6.241
2015	8	8	21	56	30.88	43.8264	10.3519	3.828
2016	7	16	9	21	50.02	43.7977	10.3846	14.727
2016	7	19	4	40	39.87	43.8025	10.3564	10.705
2016	7	19	5	19	18.29	43.8042	10.3591	10.972
2016	7	19	6	14	51.92	43.8055	10.356	9.543
2016	7	19	17	41	53.88	43.8024	10.3563	8.956
2016	7	19	22	35	15.12	43.8014	10.3596	10.903
2016	7	20	0	13	21.61	43.8043	10.3544	8.836
2016	7	20	23	19	39.36	43.8047	10.3669	11.036
2016	7	21	17	57	3.8	43.8019	10.3553	10.477
2016	7	22	19	28	24.2	43.8005	10.3702	12.515
2016	7	23	13	22	39.92	43.8008	10.3621	10.699
2016	7	23	23	54	58.3	43.7991	10.3617	11.333
2016	7	25	7	39	31.18	43.7996	10.3617	11.141
2016	7	29	17	45	32.9	43.8024	10.3925	15.144
2016	8	2	20	24	10.16	43.8007	10.3593	10.789
2016	8	4	1	55	30.16	43.7858	10.3537	3.878
2016	8	9	3	8	56.61	43.8019	10.3568	10.662
2016	8	9	11	20	53.24	43.8047	10.3662	10.02
2016	8	12	5	57	3.7	43.8	10.3681	12.252
2016	8	14	23	5	10.34	43.8018	10.363	10.651
2016	8	15	10	13	21.73	43.8008	10.3668	10.986
2016	8	18	1	17	11.39	43.8013	10.368	10.672
2016	8	22	1	54	6.86	43.7968	10.379	8.329
2016	8	24	9	57	1.25	43.7985	10.3708	11.788
2016	8	24	10	14	36.68	43.8025	10.3666	10.532
2021	9	5	9	48	34.62	43.8198	10.3761	10.657
2021	9	7	0	12	49.09	43.806	10.3964	13.361
2021	9	8	15	7	12.03	43.8152	10.3691	10.697
2021	9	11	5	14	39.12	43.8066	10.3626	10.067
2021	9	13	21	56	47	43.8174	10.3669	11.011
2021	9	15	10	39	41.98	43.8157	10.3707	10.365
2021	9	15	21	45	11.52	43.8078	10.3713	10.669
2021	9	29	14	1	45.08	43.8269	10.4203	8.236
2021	10	8	6	11	29.67	43.8152	10.3698	10.703
2021	10	10	4	23	45.91	43.8178	10.38	11.217
2021	10	25	13	43	39.56	43.8394	10.3891	7.344
2021	10	26	5	20	37.6	43.8133	10.3795	10.559
2021	10	30	5	24	37.73	43.8085	10.3675	8.94
2021	10	31	1	39	50.45	43.8312	10.3941	10.001
2021	10	31	4	49	26.2	43.8058	10.3586	10.981
2021	11	6	23	53	57.26	43.8206	10.3856	9.797

## Sheet: Offshore Cluster
Offshore Cluster: Position of the earthquakes after re-location
Year	months	day	hour	min	sec	latitude	longitude	depth
2006	8	16	17	7	55.4	43.7681	10.1696	12.733
2006	8	16	17	16	40.36	43.7719	10.1642	10.991
2006	8	16	17	27	32.56	43.7706	10.16	6.646
2006	8	16	17	41	3.72	43.7823	10.1443	3.601
2006	8	16	17	51	46.22	43.7751	10.1577	4.512
2006	8	16	17	57	58.56	43.7914	10.2139	7.479
2006	8	16	19	9	19.56	43.7592	10.1743	11.712
2006	8	16	19	17	26.46	43.7629	10.1567	11.106
2006	8	16	19	25	45.56	43.7646	10.1606	6.502
2006	8	16	20	53	48.44	43.7859	10.1753	3.613
2006	8	16	20	55	48.72	43.7591	10.1774	12.101
2006	8	16	22	48	7.18	43.7904	10.1758	2.749
2006	8	21	0	13	12.4	43.7703	10.1619	7.575
2006	8	22	4	34	3.13	43.7681	10.162	6.667
2006	8	31	6	27	17.3	43.7743	10.1559	5.283
